# Supplementary material
Source: Springer Nature journal article supplement (https://www.springermedizin.de/resource/supplementary/13195_2009_26_MOESM1_ESM.pdf/9688580)
Supplement: MOESM1 [file 9688580]

Initial ADAMS stratified random subsample selected from the parent Health and Retirement Study (n = 1770)

```
graph TD; A["Initial ADAMS stratified random subsample selected from the parent Health and Retirement Study (n = 1770)"] --> B["Assessed at initial visit (n = 856):  
Non-demented: 548  
Demented: 308"]; A --> C["Not assessed at initial visit (n = 914):  
Deceased: 227  
Refused to participate: 500  
Other reasons: 187"];
```

Assessed at initial visit (n = 856):  
Non-demented: 548  
Demented: 308

Not assessed at initial visit (n = 914):  
Deceased: 227  
Refused to participate: 500  
Other reasons: 187
